# Supplementary material for: Metabolic profiling by gas chromatography-mass spectrometry of energy metabolism in high-fat diet-fed obese mice
Source: PubMed Central journal article supplement (PMC5433781; doi:10.1371/journal.pone.0177953), 2017-05-16
Supplement: pone.0177953.s003.pdf [file pone.0177953.s003.pdf]

**S1 Table. Published methods for the derivatization and quantitation of intermediary metabolites**

| No. | Technique            | Extraction procedure; Internal standard; Column                                                                                             | Linear range; Derivatization reagent                                                                             | Application                                                         | Ref. no         |
|-----|----------------------|---------------------------------------------------------------------------------------------------------------------------------------------|------------------------------------------------------------------------------------------------------------------|---------------------------------------------------------------------|-----------------|
| 1   | GC-FID               | Protein precipitation; glutaric acid; SE-30 packed column (2 m x 4 mm)                                                                      | 10-25 µg; <i>N,O</i> -bis-(trimethylsilyl)acetamide (BSA)                                                        | Insect hemolymph                                                    | 32              |
| 2   | LC-MS/MS             | Liquid-liquid extraction; isotope-labeled internal standards; Waters XBridge C18 column (2.1 × 50 mm, Waters)                               | 1.0-50 µg/mL; <i>O</i> -benzylhydroxylamine (OBH)                                                                | Cancer cells, tumor samples                                         | 33              |
| 3   | GC-MS;               | Protein Precipitation; [ <sup>15</sup> N]glutamic acid; FactorFour™ VF-5ms capillary column (30 m × 0.25 mm, 0.25 µm)                       | 2.0-20.0 µg/L; BSTFA + 1% TMCS <sup>a</sup>                                                                      | Human blood                                                         | 34              |
| 4   | Ion-Exchange (IC-ED) | Monophasic liquid extraction; AS11-HC analytical column                                                                                     | Lactate (2-100 µM), malate (4-50 µM), phosphate (20-1000 µM), citrate (4-50 µM), <i>cis</i> -aconitate (2-50 µM) | CHO cells                                                           | 35              |
| 5   | GC-MS                | Monophasic liquid extraction - liver tissue, protein precipitation-serum; DL-norleucine; capillary column (Agilent 30 m × 0.25 mm, 0.25 µm) | 0.05-50 µM, MTBSTFA + 1% TBDMCS <sup>a</sup>                                                                     | HFD treated fatty liver & serum and chow diet treated liver & serum | PW <sup>b</sup> |

<sup>a</sup>for abbreviations, see text

<sup>b</sup>PW = present work
